# Supplementary material for: Budesonide-Loaded Pectin/Polyacrylamide Hydrogel for Sustained Delivery: Fabrication, Characterization and In Vitro Release Kinetics
Source: MDPI journal article supplement (doi:10.3390/molecules26092704), 2021-05-05
Supplement: s1 [file s1]

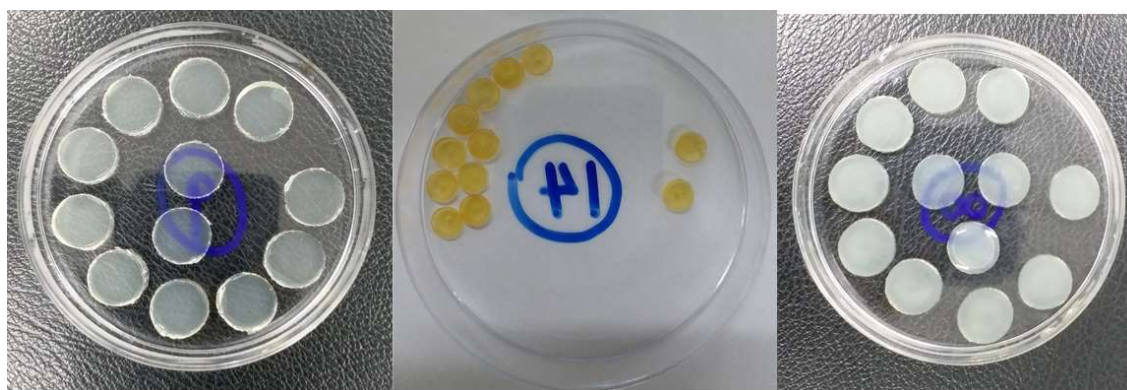

Hydrogel disk (wet)

Dried Hydrogel disk

Drug loaded Hydrogel disk (wet)

Figure S1: Photos of prepared hydrogels.

### DSC of budesonide

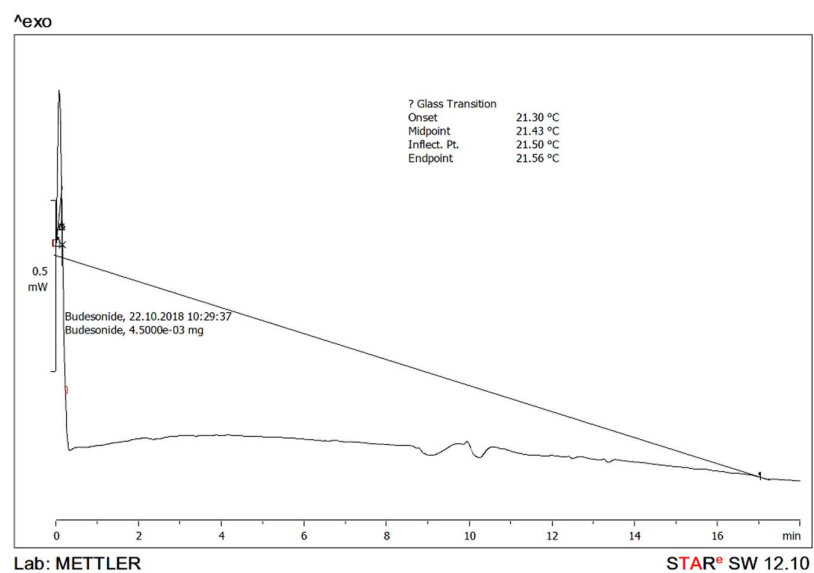

DSC of budesonide loaded hydrogel.

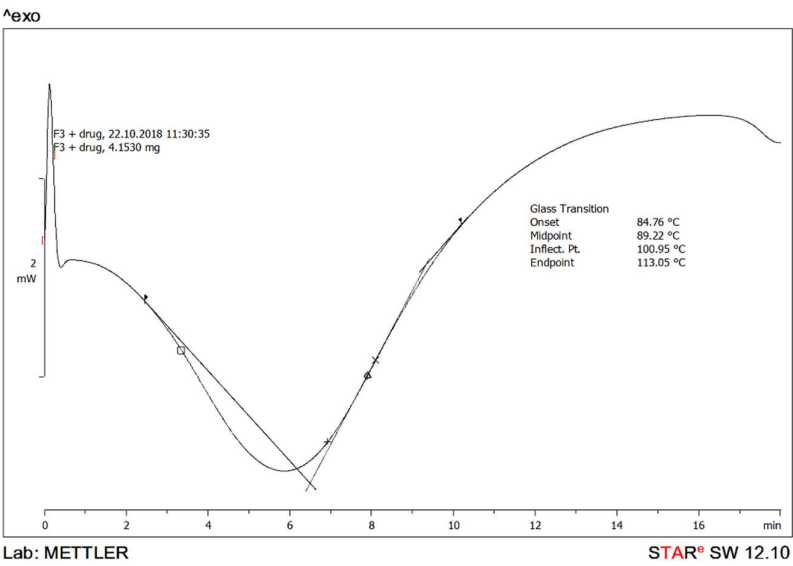

Polyacrylamide

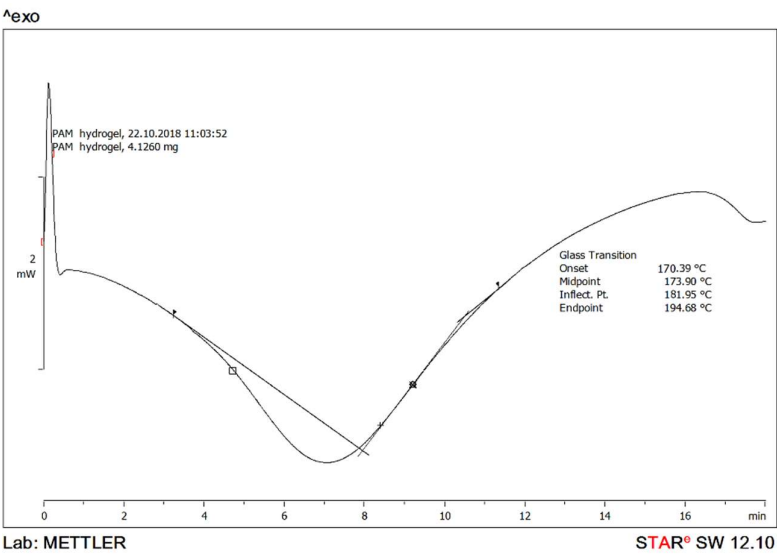

Figure S2: DSC thermogram of budesonide; budesonide loaded hydrogel; polyacrylamide.
